# Supplementary material for: The Anti-Inflammatory Compound Curcumin Enhances Locomotor and Sensory Recovery after Spinal Cord Injury in Rats by Immunomodulation
Source: PubMed Central journal article supplement (PMC4730294; doi:10.3390/ijms17010049), 2015-12-31
Supplement: ijms-17-00049-s001.pdf [file ijms-17-00049-s001.pdf]

# Supplementary Materials: The Anti-Inflammatory Compound Curcumin Enhances Locomotor and Sensory Recovery after Spinal Cord Injury in Rats by Immunomodulation

Lucia Machova Urdzikova, Kristyna Karová, Jiri Ruzicka, Anna Kloudova, Craig Shannon, Jana Dubisova, Raj Murali, Sarka Kubinova, Eva Sykova, Meena Jhanwar-Uniyal and Pavla Jendelova

Table S1. TaqMan® Gene Expression Assays.

| Gene Name/Gene Symbol                                       | Assay ID      |
|-------------------------------------------------------------|---------------|
| <i>glyceraldehyde 3-phosphate dehydrogenase/Gapdh</i>       | Rn01775763_g1 |
| <i>neurotrophin 3/Sort1</i>                                 | Rn01521847_m1 |
| <i>basic fibroblast growth factor/Egf2</i>                  | Rn00570809_m1 |
| <i>oligodendrocyte lineage transcription factor 2/Olig2</i> | Rn01767116_m1 |
| <i>growth associated protein 43/Gap43</i>                   | Rn01474579_m1 |
| <i>glial fibrillary acidic protein/Gfap</i>                 | Rn00566603_m1 |
| <i>vascular endothelial growth factor A/Vegfa</i>           | Rn01511601_m1 |
| <i>nuclear factor of kappa B1/Nfkb1</i>                     | Rn01399572_m1 |
| <i>ciliary neurotrophic factor/cntf</i>                     | Rn00755092_m1 |
| <i>macrophage inflammatory protein 1α/Ccl3</i>              | Rn01464736_g1 |
| <i>chemokine (C-C motif) ligand 5/RANTES/Ccl5</i>           | Rn00579590_m1 |
| CD86                                                        | Rn00571654_m1 |
| CD163                                                       | Rn01492519_m1 |
| <i>interferon regulatory factor 5/Irf5</i>                  | Rn01500522_m1 |
| <i>macrophage mannose receptor 1/Mrc1</i>                   | Rn01487342_m1 |

## Flat Beam Test Categories

- (1) 0: The rat is unable to place the affected hind paw on the horizontal surface of the beam, and its hind body falls off the beam in less than 60 s.
- (2) 1: The rat is unable to start traversing the beam, but keeps its body on the beam for 60 s.
- (3) 2: The rat traverses half of the beam dragging its hindlimbs.
- (4) 3: The rat traverses the whole length of the beam dragging its hindlimbs.
- (5) 4: The rat traverses the whole length of the beam and one of two hindlimbs is placed on the beam.
- (6) 5: The rat traverses the whole length of the beam and places both hindlimbs to aid less than half of its steps.
- (7) 6: The rat traverses the whole length of the beam and places both hindlimbs to aid more than half of its steps.
- (8) 7: The rat traverses the whole length of the beam with no more than 2 footslips.
